# Supplementary material
Source: publisher figshare collection journal article supplement (https://gsajournals.figshare.com/ndownloader/files/29091417)
Supplement: Supplementary file 1 [file 29091417]

## Sheet: GHAresistance
generation	population	population_replicate	treatment	treatment_replicate	day	sex	status	repeat		gen = generation 10 or 19
10	C	1	GHA	1	4	F	1	1		population = population S or C
10	C	1	GHA	1	5	F	1	1		population_replicate = replicate population 1, 2, 3, or 4
10	C	1	GHA	1	6	F	1	1		treatment = GHA or control
10	C	1	GHA	1	6	F	1	1		treatment_replicate = replicate cage within the same treatment
10	C	1	GHA	1	6	F	1	1		sex = male or female
10	C	1	GHA	1	7	F	1	1		daynumber = days after inoculation
10	C	1	GHA	1	7	F	1	1		status = 1 dead, 0 alive/censor
10	C	1	GHA	1	8	F	1	1		repeat = number of flies with a particular status (in same row)
10	C	1	GHA	1	8	F	1	1
10	C	1	GHA	1	8	F	1	1
10	C	1	GHA	1	8	F	1	1
10	C	1	GHA	1	8	F	1	1
10	C	1	GHA	1	9	F	1	1
10	C	1	GHA	1	9	F	1	1
10	C	1	GHA	1	9	F	1	1
10	C	1	GHA	1	9	F	1	1
10	C	1	GHA	1	9	F	1	1
10	C	1	GHA	1	9	F	1	1
10	C	1	GHA	1	9	F	1	1
10	C	1	GHA	1	9	F	1	1
10	C	1	GHA	1	10	F	1	1
10	C	1	GHA	1	10	F	1	1
10	C	1	GHA	1	10	F	1	1
10	C	1	GHA	1	10	F	1	1
10	C	1	GHA	1	10	F	1	1
10	C	1	GHA	1	10	F	1	1
10	C	1	GHA	1	11	F	1	1
10	C	1	GHA	1	10	F	0	1
10	C	1	GHA	1	13	F	1	1
10	C	1	GHA	1	13	F	1	1
10	C	1	GHA	1	13	F	1	1
10	C	1	GHA	1	14	F	1	1
10	C	1	GHA	1	14	F	1	1
10	C	1	GHA	1	14	F	1	1
10	C	1	GHA	1	14	F	1	1
10	C	1	GHA	1	16	F	1	1
10	C	1	GHA	1	17	F	1	1
10	C	1	GHA	1	21	F	1	1
10	C	1	GHA	1	23	F	1	1
10	C	1	GHA	1	28	F	1	1
10	C	1	GHA	1	28	F	1	1
10	C	1	GHA	1	29	F	1	1
10	C	1	GHA	1	29	F	1	1
10	C	1	GHA	1	29	F	1	1
10	C	1	GHA	1	34	F	1	1
10	C	1	GHA	1	35	F	1	1
10	C	1	GHA	1	38	F	1	1
10	C	1	GHA	1	46	F	1	1
10	C	1	GHA	1	46	F	1	1
10	C	1	GHA	1	47	F	1	1
10	C	1	GHA	1	49	F	1	1
10	C	1	GHA	1	6	M	1	1
10	C	1	GHA	1	7	M	1	1
10	C	1	GHA	1	7	M	1	1
10	C	1	GHA	1	8	M	1	1
10	C	1	GHA	1	8	M	1	1
10	C	1	GHA	1	8	M	1	1
10	C	1	GHA	1	8	M	1	1
10	C	1	GHA	1	8	M	1	1
10	C	1	GHA	1	9	M	1	1
10	C	1	GHA	1	9	M	1	1
10	C	1	GHA	1	9	M	1	1
10	C	1	GHA	1	9	M	1	1
10	C	1	GHA	1	9	M	1	1
10	C	1	GHA	1	9	M	1	1
10	C	1	GHA	1	9	M	1	1
10	C	1	GHA	1	10	M	0	1
10	C	1	GHA	1	10	M	1	1
10	C	1	GHA	1	10	M	1	1
10	C	1	GHA	1	10	M	1	1
10	C	1	GHA	1	11	M	1	1
10	C	1	GHA	1	11	M	1	1
10	C	1	GHA	1	11	M	1	1
10	C	1	GHA	1	12	M	1	1
10	C	1	GHA	1	12	M	1	1
10	C	1	GHA	1	12	M	1	1
10	C	1	GHA	1	13	M	1	1
10	C	1	GHA	1	13	M	1	1
10	C	1	GHA	1	13	M	1	1
10	C	1	GHA	1	13	M	1	1
10	C	1	GHA	1	13	M	1	1
10	C	1	GHA	1	13	M	1	1
10	C	1	GHA	1	14	M	1	1
10	C	1	GHA	1	14	M	1	1
10	C	1	GHA	1	16	M	1	1
10	C	1	GHA	1	16	M	1	1
10	C	1	GHA	1	16	M	1	1
10	C	1	GHA	1	17	M	1	1
10	C	1	GHA	1	18	M	1	1
10	C	1	GHA	1	18	M	1	1
10	C	1	GHA	1	18	M	1	1
10	C	1	GHA	1	26	M	1	1
10	C	1	GHA	1	30	M	1	1
10	C	1	GHA	1	39	M	1	1
10	C	1	GHA	1	41	M	1	1
10	C	1	GHA	1	49	M	0	1
10	C	1	GHA	1	52	M	1	1
10	C	1	GHA	2	6	F	1	1
10	C	1	GHA	2	6	F	1	1
10	C	1	GHA	2	6	F	1	1
10	C	1	GHA	2	7	F	1	1
10	C	1	GHA	2	7	F	1	1
10	C	1	GHA	2	7	F	1	1
10	C	1	GHA	2	8	F	1	1
10	C	1	GHA	2	8	F	1	1
10	C	1	GHA	2	8	F	1	1
10	C	1	GHA	2	9	F	1	1
10	C	1	GHA	2	9	F	1	1
10	C	1	GHA	2	9	F	1	1
10	C	1	GHA	2	9	F	1	1
10	C	1	GHA	2	9	F	1	1
10	C	1	GHA	2	9	F	1	1
10	C	1	GHA	2	9	F	1	1
10	C	1	GHA	2	9	F	1	1
10	C	1	GHA	2	10	F	1	1
10	C	1	GHA	2	10	F	1	1
10	C	1	GHA	2	10	F	1	1
10	C	1	GHA	2	10	F	1	1
10	C	1	GHA	2	10	F	1	1
10	C	1	GHA	2	10	F	1	1
10	C	1	GHA	2	11	F	1	1
10	C	1	GHA	2	11	F	1	1
10	C	1	GHA	2	11	F	1	1
10	C	1	GHA	2	11	F	1	1
10	C	1	GHA	2	11	F	1	1
10	C	1	GHA	2	11	F	1	1
10	C	1	GHA	2	11	F	1	1
10	C	1	GHA	2	12	F	1	1
10	C	1	GHA	2	12	F	1	1
10	C	1	GHA	2	12	F	1	1
10	C	1	GHA	2	12	F	1	1
10	C	1	GHA	2	13	F	1	1
10	C	1	GHA	2	13	F	1	1
10	C	1	GHA	2	13	F	1	1
10	C	1	GHA	2	13	F	1	1
10	C	1	GHA	2	13	F	1	1
10	C	1	GHA	2	14	F	1	1
10	C	1	GHA	2	14	F	1	1
10	C	1	GHA	2	14	F	1	1
10	C	1	GHA	2	15	F	1	1
10	C	1	GHA	2	15	F	1	1
10	C	1	GHA	2	15	F	1	1
10	C	1	GHA	2	16	F	1	1
10	C	1	GHA	2	17	F	1	1
10	C	1	GHA	2	19	F	1	1
10	C	1	GHA	2	20	F	1	1
10	C	1	GHA	2	20	F	1	1
10	C	1	GHA	2	21	F	1	1
10	C	1	GHA	2	21	F	1	1
10	C	1	GHA	2	21	F	1	1
10	C	1	GHA	2	22	F	1	1
10	C	1	GHA	2	23	F	1	1
10	C	1	GHA	2	24	F	1	1
10	C	1	GHA	2	26	F	1	1
10	C	1	GHA	2	26	F	1	1
10	C	1	GHA	2	27	F	1	1
10	C	1	GHA	2	30	F	1	1
10	C	1	GHA	2	31	F	1	1
10	C	1	GHA	2	32	F	1	1
10	C	1	GHA	2	33	F	1	1
10	C	1	GHA	2	36	F	1	1
10	C	1	GHA	2	36	F	1	1
10	C	1	GHA	2	38	F	1	1
10	C	1	GHA	2	42	F	1	1
10	C	1	GHA	2	47	F	1	1
10	C	1	GHA	2	54	F	1	1
10	C	1	GHA	2	5	M	1	1
10	C	1	GHA	2	7	M	1	1
10	C	1	GHA	2	7	M	1	1
10	C	1	GHA	2	7	M	1	1
10	C	1	GHA	2	8	M	1	1
10	C	1	GHA	2	8	M	1	1
10	C	1	GHA	2	8	M	1	1
10	C	1	GHA	2	8	M	1	1
10	C	1	GHA	2	8	M	1	1
10	C	1	GHA	2	8	M	1	1
10	C	1	GHA	2	9	M	1	1
10	C	1	GHA	2	9	M	1	1
10	C	1	GHA	2	9	M	1	1
10	C	1	GHA	2	9	M	1	1
10	C	1	GHA	2	9	M	1	1
10	C	1	GHA	2	9	M	1	1
10	C	1	GHA	2	9	M	1	1
10	C	1	GHA	2	9	M	1	1
10	C	1	GHA	2	9	M	1	1
10	C	1	GHA	2	9	M	1	1
10	C	1	GHA	2	9	M	1	1
10	C	1	GHA	2	10	M	1	1
10	C	1	GHA	2	10	M	1	1
10	C	1	GHA	2	10	M	1	1
10	C	1	GHA	2	10	M	1	1
10	C	1	GHA	2	10	M	1	1
10	C	1	GHA	2	10	M	1	1
10	C	1	GHA	2	10	M	1	1
10	C	1	GHA	2	10	M	1	1
10	C	1	GHA	2	10	M	1	1
10	C	1	GHA	2	10	M	1	1
10	C	1	GHA	2	10	M	1	1
10	C	1	GHA	2	11	M	1	1
10	C	1	GHA	2	11	M	1	1
10	C	1	GHA	2	11	M	1	1
10	C	1	GHA	2	11	M	1	1
10	C	1	GHA	2	11	M	1	1
10	C	1	GHA	2	11	M	1	1
10	C	1	GHA	2	12	M	1	1
10	C	1	GHA	2	12	M	1	1
10	C	1	GHA	2	12	M	1	1
10	C	1	GHA	2	12	M	1	1
10	C	1	GHA	2	12	M	1	1
10	C	1	GHA	2	12	M	1	1
10	C	1	GHA	2	13	M	1	1
10	C	1	GHA	2	13	M	1	1
10	C	1	GHA	2	14	M	1	1
10	C	1	GHA	2	14	M	1	1
10	C	1	GHA	2	16	M	1	1
10	C	1	GHA	2	17	M	1	1
10	C	1	GHA	2	17	M	1	1
10	C	1	GHA	2	17	M	1	1
10	C	1	GHA	2	17	M	1	1
10	C	1	GHA	2	17	M	1	1
10	C	1	GHA	2	18	M	1	1
10	C	1	GHA	2	18	M	1	1
10	C	1	GHA	2	19	M	1	1
10	C	1	GHA	2	20	M	1	1
10	C	1	GHA	2	20	M	1	1
10	C	1	GHA	2	21	M	1	1
10	C	1	GHA	2	22	M	1	1
10	C	1	GHA	2	27	M	1	1
10	C	1	GHA	2	28	M	0	1
10	C	1	GHA	2	35	M	0	1
10	C	1	GHA	2	38	M	1	1
10	C	1	GHA	2	38	M	1	1
10	C	1	GHA	2	42	M	1	1
10	S	1	GHA	1	4	F	1	1
10	S	1	GHA	1	5	F	1	1
10	S	1	GHA	1	5	F	1	1
10	S	1	GHA	1	7	F	1	1
10	S	1	GHA	1	7	F	1	1
10	S	1	GHA	1	7	F	1	1
10	S	1	GHA	1	7	F	1	1
10	S	1	GHA	1	8	F	1	1
10	S	1	GHA	1	9	F	1	1
10	S	1	GHA	1	9	F	1	1
10	S	1	GHA	1	9	F	1	1
10	S	1	GHA	1	9	F	1	1
10	S	1	GHA	1	9	F	1	1
10	S	1	GHA	1	9	F	1	1
10	S	1	GHA	1	10	F	1	1
10	S	1	GHA	1	10	F	1	1
10	S	1	GHA	1	11	F	1	1
10	S	1	GHA	1	11	F	1	1
10	S	1	GHA	1	12	F	1	1
10	S	1	GHA	1	12	F	1	1
10	S	1	GHA	1	12	F	1	1
10	S	1	GHA	1	12	F	1	1
10	S	1	GHA	1	12	F	1	1
10	S	1	GHA	1	13	F	1	1
10	S	1	GHA	1	13	F	1	1
10	S	1	GHA	1	14	F	1	1
10	S	1	GHA	1	14	F	1	1
10	S	1	GHA	1	14	F	1	1
10	S	1	GHA	1	15	F	1	1
10	S	1	GHA	1	15	F	1	1
10	S	1	GHA	1	16	F	1	1
10	S	1	GHA	1	18	F	1	1
10	S	1	GHA	1	21	F	1	1
10	S	1	GHA	1	22	F	1	1
10	S	1	GHA	1	23	F	1	1
10	S	1	GHA	1	23	F	1	1
10	S	1	GHA	1	24	F	1	1
10	S	1	GHA	1	24	F	1	1
10	S	1	GHA	1	25	F	1	1
10	S	1	GHA	1	28	F	1	1
10	S	1	GHA	1	28	F	1	1
10	S	1	GHA	1	30	F	1	1
10	S	1	GHA	1	30	F	1	1
10	S	1	GHA	1	30	F	1	1
10	S	1	GHA	1	33	F	1	1
10	S	1	GHA	1	34	F	1	1
10	S	1	GHA	1	39	F	1	1
10	S	1	GHA	1	41	F	1	1
10	S	1	GHA	1	48	F	1	1
10	S	1	GHA	1	49	F	1	1
10	S	1	GHA	1	50	F	1	1
10	S	1	GHA	1	56	F	1	1
10	S	1	GHA	1	56	F	1	1
10	S	1	GHA	1	58	F	0	1
10	S	1	GHA	1	61	F	1	1
10	S	1	GHA	1	9	M	1	1
10	S	1	GHA	1	9	M	1	1
10	S	1	GHA	1	9	M	1	1
10	S	1	GHA	1	10	M	1	1
10	S	1	GHA	1	10	M	1	1
10	S	1	GHA	1	10	M	1	1
10	S	1	GHA	1	10	M	1	1
10	S	1	GHA	1	11	M	1	1
10	S	1	GHA	1	11	M	1	1
10	S	1	GHA	1	11	M	1	1
10	S	1	GHA	1	11	M	1	1
10	S	1	GHA	1	11	M	1	1
10	S	1	GHA	1	11	M	1	1
10	S	1	GHA	1	12	M	1	1
10	S	1	GHA	1	12	M	1	1
10	S	1	GHA	1	12	M	1	1
10	S	1	GHA	1	12	M	1	1
10	S	1	GHA	1	13	M	1	1
10	S	1	GHA	1	13	M	1	1
10	S	1	GHA	1	13	M	1	1
10	S	1	GHA	1	13	M	1	1
10	S	1	GHA	1	13	M	1	1
10	S	1	GHA	1	14	M	1	1
10	S	1	GHA	1	14	M	1	1
10	S	1	GHA	1	14	M	1	1
10	S	1	GHA	1	14	M	1	1
10	S	1	GHA	1	14	M	1	1
10	S	1	GHA	1	15	M	1	1
10	S	1	GHA	1	15	M	1	1
10	S	1	GHA	1	16	M	1	1
10	S	1	GHA	1	16	M	1	1
10	S	1	GHA	1	17	M	1	1
10	S	1	GHA	1	19	M	1	1
10	S	1	GHA	1	19	M	1	1
10	S	1	GHA	1	20	M	1	1
10	S	1	GHA	1	20	M	1	1
10	S	1	GHA	1	24	M	1	1
10	S	1	GHA	1	27	M	1	1
10	S	1	GHA	1	29	M	1	1
10	S	1	GHA	1	38	M	1	1
10	S	1	GHA	1	38	M	1	1
10	S	1	GHA	1	40	M	1	1
10	S	1	GHA	1	42	M	1	1
10	S	1	GHA	1	42	M	1	1
10	S	1	GHA	1	44	M	1	1
10	S	1	GHA	1	45	M	1	1
10	S	1	GHA	1	48	M	0	1
10	S	1	GHA	1	51	M	1	1
10	S	1	GHA	1	54	M	1	1
10	S	1	GHA	1	60	M	1	1
10	S	1	GHA	1	63	M	1	1
10	S	1	GHA	1	63	M	1	1
10	S	1	GHA	2	4	F	1	1
10	S	1	GHA	2	6	F	1	1
10	S	1	GHA	2	6	F	1	1
10	S	1	GHA	2	6	F	1	1
10	S	1	GHA	2	8	F	1	1
10	S	1	GHA	2	8	F	1	1
10	S	1	GHA	2	9	F	1	1
10	S	1	GHA	2	9	F	1	1
10	S	1	GHA	2	9	F	1	1
10	S	1	GHA	2	9	F	1	1
10	S	1	GHA	2	9	F	1	1
10	S	1	GHA	2	10	F	1	1
10	S	1	GHA	2	10	F	1	1
10	S	1	GHA	2	11	F	1	1
10	S	1	GHA	2	11	F	1	1
10	S	1	GHA	2	11	F	1	1
10	S	1	GHA	2	11	F	1	1
10	S	1	GHA	2	12	F	1	1
10	S	1	GHA	2	13	F	1	1
10	S	1	GHA	2	13	F	1	1
10	S	1	GHA	2	13	F	1	1
10	S	1	GHA	2	13	F	1	1
10	S	1	GHA	2	14	F	1	1
10	S	1	GHA	2	14	F	1	1
10	S	1	GHA	2	14	F	1	1
10	S	1	GHA	2	15	F	1	1
10	S	1	GHA	2	16	F	1	1
10	S	1	GHA	2	16	F	1	1
10	S	1	GHA	2	17	F	1	1
10	S	1	GHA	2	18	F	1	1
10	S	1	GHA	2	19	F	1	1
10	S	1	GHA	2	20	F	1	1
10	S	1	GHA	2	21	F	1	1
10	S	1	GHA	2	22	F	1	1
10	S	1	GHA	2	24	F	1	1
10	S	1	GHA	2	26	F	1	1
10	S	1	GHA	2	27	F	1	1
10	S	1	GHA	2	28	F	1	1
10	S	1	GHA	2	30	F	1	1
10	S	1	GHA	2	30	F	1	1
10	S	1	GHA	2	45	F	1	1
10	S	1	GHA	2	47	F	1	1
10	S	1	GHA	2	51	F	1	1
10	S	1	GHA	2	52	F	1	1
10	S	1	GHA	2	53	F	1	1
10	S	1	GHA	2	57	F	1	1
10	S	1	GHA	2	8	M	1	1
10	S	1	GHA	2	8	M	1	1
10	S	1	GHA	2	8	M	1	1
10	S	1	GHA	2	9	M	1	1
10	S	1	GHA	2	9	M	1	1
10	S	1	GHA	2	9	M	1	1
10	S	1	GHA	2	9	M	1	1
10	S	1	GHA	2	9	M	1	1
10	S	1	GHA	2	9	M	1	1
10	S	1	GHA	2	10	M	1	1
10	S	1	GHA	2	10	M	1	1
10	S	1	GHA	2	11	M	1	1
10	S	1	GHA	2	11	M	1	1
10	S	1	GHA	2	11	M	1	1
10	S	1	GHA	2	11	M	1	1
10	S	1	GHA	2	12	M	1	1
10	S	1	GHA	2	12	M	1	1
10	S	1	GHA	2	12	M	1	1
10	S	1	GHA	2	12	M	1	1
10	S	1	GHA	2	13	M	1	1
10	S	1	GHA	2	13	M	1	1
10	S	1	GHA	2	13	M	1	1
10	S	1	GHA	2	13	M	1	1
10	S	1	GHA	2	13	M	1	1
10	S	1	GHA	2	13	M	1	1
10	S	1	GHA	2	13	M	1	1
10	S	1	GHA	2	14	M	1	1
10	S	1	GHA	2	14	M	1	1
10	S	1	GHA	2	14	M	1	1
10	S	1	GHA	2	14	M	1	1
10	S	1	GHA	2	14	M	1	1
10	S	1	GHA	2	15	M	1	1
10	S	1	GHA	2	15	M	1	1
10	S	1	GHA	2	16	M	1	1
10	S	1	GHA	2	16	M	1	1
10	S	1	GHA	2	16	M	1	1
10	S	1	GHA	2	17	M	1	1
10	S	1	GHA	2	17	M	1	1
10	S	1	GHA	2	17	M	1	1
10	S	1	GHA	2	18	M	1	1
10	S	1	GHA	2	19	M	1	1
10	S	1	GHA	2	19	M	0	1
10	S	1	GHA	2	21	M	1	1
10	S	1	GHA	2	24	M	0	1
10	S	1	GHA	2	27	M	1	1
10	S	1	GHA	2	36	M	1	1
10	S	1	GHA	2	37	M	1	1
10	S	1	GHA	2	37	M	1	1
10	S	1	GHA	2	38	M	1	1
10	S	1	GHA	2	38	M	1	1
10	S	1	GHA	2	40	M	1	1
10	S	1	GHA	2	44	M	1	1
10	S	1	GHA	2	46	M	1	1
10	S	1	GHA	2	46	M	1	1
10	S	1	GHA	2	50	M	1	1
10	S	1	GHA	2	52	M	1	1
10	S	1	GHA	2	57	M	1	1
10	S	1	GHA	2	60	M	1	1
10	C	2	GHA	1	2	F	1	1
10	C	2	GHA	1	2	F	1	1
10	C	2	GHA	1	3	F	1	1
10	C	2	GHA	1	4	F	1	1
10	C	2	GHA	1	4	F	1	1
10	C	2	GHA	1	5	F	1	1
10	C	2	GHA	1	5	F	1	1
10	C	2	GHA	1	5	F	1	1
10	C	2	GHA	1	5	F	1	1
10	C	2	GHA	1	5	F	1	1
10	C	2	GHA	1	5	F	1	1
10	C	2	GHA	1	6	F	1	1
10	C	2	GHA	1	6	F	1	1
10	C	2	GHA	1	6	F	1	1
10	C	2	GHA	1	7	F	1	1
10	C	2	GHA	1	7	F	1	1
10	C	2	GHA	1	7	F	1	1
10	C	2	GHA	1	8	F	1	1
10	C	2	GHA	1	9	F	1	1
10	C	2	GHA	1	9	F	1	1
10	C	2	GHA	1	9	F	1	1
10	C	2	GHA	1	10	F	1	1
10	C	2	GHA	1	10	F	1	1
10	C	2	GHA	1	10	F	1	1
10	C	2	GHA	1	10	F	1	1
10	C	2	GHA	1	11	F	1	1
10	C	2	GHA	1	11	F	1	1
10	C	2	GHA	1	12	F	1	1
10	C	2	GHA	1	12	F	1	1
10	C	2	GHA	1	14	F	0	1
10	C	2	GHA	1	13	F	1	1
10	C	2	GHA	1	13	F	1	1
10	C	2	GHA	1	13	F	1	1
10	C	2	GHA	1	14	F	1	1
10	C	2	GHA	1	14	F	1	1
10	C	2	GHA	1	14	F	1	1
10	C	2	GHA	1	15	F	1	1
10	C	2	GHA	1	16	F	1	1
10	C	2	GHA	1	16	F	1	1
10	C	2	GHA	1	18	F	1	1
10	C	2	GHA	1	18	F	1	1
10	C	2	GHA	1	19	F	1	1
10	C	2	GHA	1	19	F	1	1
10	C	2	GHA	1	23	F	1	1
10	C	2	GHA	1	27	F	1	1
10	C	2	GHA	1	32	F	1	1
10	C	2	GHA	1	32	F	1	1
10	C	2	GHA	1	35	F	1	1
10	C	2	GHA	1	36	F	1	1
10	C	2	GHA	1	40	F	1	1
10	C	2	GHA	1	43	F	1	1
10	C	2	GHA	1	43	F	1	1
10	C	2	GHA	1	43	F	1	1
10	C	2	GHA	1	4	M	1	1
10	C	2	GHA	1	6	M	1	1
10	C	2	GHA	1	6	M	1	1
10	C	2	GHA	1	6	M	1	1
10	C	2	GHA	1	6	M	1	1
10	C	2	GHA	1	7	M	1	1
10	C	2	GHA	1	7	M	1	1
10	C	2	GHA	1	7	M	1	1
10	C	2	GHA	1	7	M	1	1
10	C	2	GHA	1	7	M	1	1
10	C	2	GHA	1	7	M	1	1
10	C	2	GHA	1	7	M	1	1
10	C	2	GHA	1	7	M	1	1
10	C	2	GHA	1	7	M	1	1
10	C	2	GHA	1	7	M	1	1
10	C	2	GHA	1	7	M	1	1
10	C	2	GHA	1	8	M	1	1
10	C	2	GHA	1	8	M	1	1
10	C	2	GHA	1	8	M	1	1
10	C	2	GHA	1	9	M	1	1
10	C	2	GHA	1	9	M	1	1
10	C	2	GHA	1	10	M	1	1
10	C	2	GHA	1	10	M	1	1
10	C	2	GHA	1	10	M	1	1
10	C	2	GHA	1	10	M	1	1
10	C	2	GHA	1	11	M	1	1
10	C	2	GHA	1	11	M	1	1
10	C	2	GHA	1	12	M	1	1
10	C	2	GHA	1	12	M	1	1
10	C	2	GHA	1	12	M	1	1
10	C	2	GHA	1	12	M	1	1
10	C	2	GHA	1	13	M	1	1
10	C	2	GHA	1	15	M	1	1
10	C	2	GHA	1	15	M	1	1
10	C	2	GHA	1	17	M	1	1
10	C	2	GHA	1	19	M	1	1
10	C	2	GHA	1	36	M	1	1
10	C	2	GHA	1	45	M	1	1
10	C	2	GHA	1	50	M	1	1
10	C	2	GHA	1	50	M	1	1
10	C	2	GHA	1	55	M	1	1
10	C	2	GHA	2	2	F	1	1
10	C	2	GHA	2	2	F	1	1
10	C	2	GHA	2	2	F	1	1
10	C	2	GHA	2	2	F	1	1
10	C	2	GHA	2	3	F	1	1
10	C	2	GHA	2	4	F	1	1
10	C	2	GHA	2	4	F	1	1
10	C	2	GHA	2	4	F	1	1
10	C	2	GHA	2	5	F	1	1
10	C	2	GHA	2	5	F	1	1
10	C	2	GHA	2	5	F	1	1
10	C	2	GHA	2	6	F	1	1
10	C	2	GHA	2	6	F	1	1
10	C	2	GHA	2	6	F	1	1
10	C	2	GHA	2	7	F	1	1
10	C	2	GHA	2	7	F	1	1
10	C	2	GHA	2	8	F	1	1
10	C	2	GHA	2	8	F	1	1
10	C	2	GHA	2	9	F	1	1
10	C	2	GHA	2	9	F	1	1
10	C	2	GHA	2	10	F	1	1
10	C	2	GHA	2	10	F	1	1
10	C	2	GHA	2	10	F	1	1
10	C	2	GHA	2	10	F	1	1
10	C	2	GHA	2	10	F	1	1
10	C	2	GHA	2	11	F	1	1
10	C	2	GHA	2	12	F	1	1
10	C	2	GHA	2	13	F	1	1
10	C	2	GHA	2	13	F	1	1
10	C	2	GHA	2	14	F	1	1
10	C	2	GHA	2	14	F	1	1
10	C	2	GHA	2	15	F	1	1
10	C	2	GHA	2	15	F	1	1
10	C	2	GHA	2	16	F	1	1
10	C	2	GHA	2	16	F	1	1
10	C	2	GHA	2	22	F	1	1
10	C	2	GHA	2	23	F	1	1
10	C	2	GHA	2	29	F	1	1
10	C	2	GHA	2	38	F	1	1
10	C	2	GHA	2	2	M	1	1
10	C	2	GHA	2	6	M	1	1
10	C	2	GHA	2	6	M	1	1
10	C	2	GHA	2	6	M	1	1
10	C	2	GHA	2	7	M	1	1
10	C	2	GHA	2	7	M	1	1
10	C	2	GHA	2	8	M	1	1
10	C	2	GHA	2	8	M	1	1
10	C	2	GHA	2	8	M	1	1
10	C	2	GHA	2	9	M	1	1
10	C	2	GHA	2	9	M	1	1
10	C	2	GHA	2	9	M	1	1
10	C	2	GHA	2	10	M	1	1
10	C	2	GHA	2	10	M	1	1
10	C	2	GHA	2	10	M	1	1
10	C	2	GHA	2	10	M	1	1
10	C	2	GHA	2	11	M	1	1
10	C	2	GHA	2	11	M	1	1
10	C	2	GHA	2	11	M	1	1
10	C	2	GHA	2	12	M	1	1
10	C	2	GHA	2	12	M	1	1
10	C	2	GHA	2	12	M	1	1
10	C	2	GHA	2	12	M	1	1
10	C	2	GHA	2	12	M	1	1
10	C	2	GHA	2	12	M	1	1
10	C	2	GHA	2	12	M	1	1
10	C	2	GHA	2	12	M	1	1
10	C	2	GHA	2	13	M	1	1
10	C	2	GHA	2	14	M	1	1
10	C	2	GHA	2	14	M	1	1
10	C	2	GHA	2	14	M	1	1
10	C	2	GHA	2	15	M	1	1
10	C	2	GHA	2	15	M	1	1
10	C	2	GHA	2	16	M	1	1
10	C	2	GHA	2	17	M	0	1
10	C	2	GHA	2	17	M	1	1
10	C	2	GHA	2	17	M	1	1
10	C	2	GHA	2	18	M	1	1
10	C	2	GHA	2	20	M	1	1
10	C	2	GHA	2	20	M	1	1
10	C	2	GHA	2	21	M	1	1
10	C	2	GHA	2	21	M	1	1
10	C	2	GHA	2	21	M	1	1
10	C	2	GHA	2	21	M	1	1
10	C	2	GHA	2	23	M	1	1
10	C	2	GHA	2	23	M	1	1
10	C	2	GHA	2	26	M	1	1
10	C	2	GHA	2	34	M	1	1
10	C	2	GHA	2	34	M	1	1
10	C	2	GHA	2	44	M	1	1
10	C	2	GHA	2	46	M	1	1
10	S	2	GHA	1	5	F	1	1
10	S	2	GHA	1	5	F	1	1
10	S	2	GHA	1	6	F	1	1
10	S	2	GHA	1	6	F	1	1
10	S	2	GHA	1	7	F	1	1
10	S	2	GHA	1	7	F	1	1
10	S	2	GHA	1	7	F	1	1
10	S	2	GHA	1	8	F	1	1
10	S	2	GHA	1	8	F	1	1
10	S	2	GHA	1	9	F	1	1
10	S	2	GHA	1	9	F	1	1
10	S	2	GHA	1	9	F	1	1
10	S	2	GHA	1	10	F	1	1
10	S	2	GHA	1	10	F	1	1
10	S	2	GHA	1	10	F	1	1
10	S	2	GHA	1	12	F	1	1
10	S	2	GHA	1	12	F	1	1
10	S	2	GHA	1	13	F	1	1
10	S	2	GHA	1	13	F	1	1
10	S	2	GHA	1	15	F	1	1
10	S	2	GHA	1	15	F	1	1
10	S	2	GHA	1	16	F	1	1
10	S	2	GHA	1	17	F	1	1
10	S	2	GHA	1	17	F	1	1
10	S	2	GHA	1	17	F	1	1
10	S	2	GHA	1	17	F	1	1
10	S	2	GHA	1	17	F	1	1
10	S	2	GHA	1	21	F	1	1
10	S	2	GHA	1	21	F	1	1
10	S	2	GHA	1	21	F	1	1
10	S	2	GHA	1	24	F	1	1
10	S	2	GHA	1	27	F	1	1
10	S	2	GHA	1	28	F	1	1
10	S	2	GHA	1	28	F	1	1
10	S	2	GHA	1	29	F	1	1
10	S	2	GHA	1	30	F	1	1
10	S	2	GHA	1	34	F	1	1
10	S	2	GHA	1	35	F	1	1
10	S	2	GHA	1	36	F	1	1
10	S	2	GHA	1	38	F	1	1
10	S	2	GHA	1	39	F	1	1
10	S	2	GHA	1	40	F	1	1
10	S	2	GHA	1	41	F	1	1
10	S	2	GHA	1	42	F	1	1
10	S	2	GHA	1	43	F	1	1
10	S	2	GHA	1	44	F	1	1
10	S	2	GHA	1	44	F	1	1
10	S	2	GHA	1	44	F	1	1
10	S	2	GHA	1	44	F	1	1
10	S	2	GHA	1	48	F	1	1
10	S	2	GHA	1	49	F	1	1
10	S	2	GHA	1	51	F	1	1
10	S	2	GHA	1	52	F	1	1
10	S	2	GHA	1	54	F	1	1
10	S	2	GHA	1	14	M	0	1
10	S	2	GHA	1	11	M	1	1
10	S	2	GHA	1	12	M	1	1
10	S	2	GHA	1	12	M	1	1
10	S	2	GHA	1	12	M	1	1
10	S	2	GHA	1	12	M	1	1
10	S	2	GHA	1	13	M	1	1
10	S	2	GHA	1	13	M	1	1
10	S	2	GHA	1	13	M	1	1
10	S	2	GHA	1	14	M	1	1
10	S	2	GHA	1	14	M	1	1
10	S	2	GHA	1	14	M	1	1
10	S	2	GHA	1	15	M	1	1
10	S	2	GHA	1	15	M	1	1
10	S	2	GHA	1	16	M	1	1
10	S	2	GHA	1	16	M	1	1
10	S	2	GHA	1	17	M	1	1
10	S	2	GHA	1	17	M	1	1
10	S	2	GHA	1	17	M	1	1
10	S	2	GHA	1	17	M	1	1
10	S	2	GHA	1	17	M	1	1
10	S	2	GHA	1	18	M	1	1
10	S	2	GHA	1	20	M	1	1
10	S	2	GHA	1	24	M	1	1
10	S	2	GHA	1	25	M	1	1
10	S	2	GHA	1	29	M	1	1
10	S	2	GHA	1	29	M	1	1
10	S	2	GHA	1	30	M	0	1
10	S	2	GHA	1	34	M	1	1
10	S	2	GHA	1	34	M	1	1
10	S	2	GHA	1	34	M	1	1
10	S	2	GHA	1	39	M	1	1
10	S	2	GHA	1	41	M	1	1
10	S	2	GHA	1	42	M	1	1
10	S	2	GHA	1	42	M	1	1
10	S	2	GHA	1	45	M	1	1
10	S	2	GHA	1	45	M	1	1
10	S	2	GHA	1	49	M	1	1
10	S	2	GHA	1	49	M	1	1
10	S	2	GHA	1	50	M	1	1
10	S	2	GHA	1	52	M	1	1
10	S	2	GHA	1	53	M	1	1
10	S	2	GHA	1	54	M	1	1
10	S	2	GHA	2	2	F	1	1
10	S	2	GHA	2	2	F	1	1
10	S	2	GHA	2	5	F	1	1
10	S	2	GHA	2	5	F	1	1
10	S	2	GHA	2	5	F	1	1
10	S	2	GHA	2	5	F	1	1
10	S	2	GHA	2	5	F	1	1
10	S	2	GHA	2	5	F	1	1
10	S	2	GHA	2	6	F	1	1
10	S	2	GHA	2	6	F	1	1
10	S	2	GHA	2	6	F	1	1
10	S	2	GHA	2	7	F	1	1
10	S	2	GHA	2	7	F	1	1
10	S	2	GHA	2	7	F	1	1
10	S	2	GHA	2	7	F	1	1
10	S	2	GHA	2	7	F	1	1
10	S	2	GHA	2	7	F	1	1
10	S	2	GHA	2	8	F	1	1
10	S	2	GHA	2	9	F	1	1
10	S	2	GHA	2	10	F	1	1
10	S	2	GHA	2	12	F	1	1
10	S	2	GHA	2	12	F	1	1
10	S	2	GHA	2	12	F	1	1
10	S	2	GHA	2	12	F	1	1
10	S	2	GHA	2	13	F	1	1
10	S	2	GHA	2	14	F	1	1
10	S	2	GHA	2	15	F	1	1
10	S	2	GHA	2	15	F	1	1
10	S	2	GHA	2	16	F	1	1
10	S	2	GHA	2	16	F	1	1
10	S	2	GHA	2	17	F	1	1
10	S	2	GHA	2	17	F	1	1
10	S	2	GHA	2	18	F	1	1
10	S	2	GHA	2	18	F	1	1
10	S	2	GHA	2	18	F	1	1
10	S	2	GHA	2	19	F	0	1
10	S	2	GHA	2	20	F	1	1
10	S	2	GHA	2	21	F	1	1
10	S	2	GHA	2	21	F	1	1
10	S	2	GHA	2	21	F	1	1
10	S	2	GHA	2	22	F	1	1
10	S	2	GHA	2	25	F	1	1
10	S	2	GHA	2	30	F	1	1
10	S	2	GHA	2	32	F	1	1
10	S	2	GHA	2	34	F	1	1
10	S	2	GHA	2	36	F	1	1
10	S	2	GHA	2	38	F	1	1
10	S	2	GHA	2	39	F	1	1
10	S	2	GHA	2	40	F	1	1
10	S	2	GHA	2	41	F	1	1
10	S	2	GHA	2	43	F	1	1
10	S	2	GHA	2	43	F	1	1
10	S	2	GHA	2	50	F	1	1
10	S	2	GHA	2	51	F	1	1
10	S	2	GHA	2	5	M	1	1
10	S	2	GHA	2	5	M	1	1
10	S	2	GHA	2	7	M	1	1
10	S	2	GHA	2	8	M	1	1
10	S	2	GHA	2	8	M	1	1
10	S	2	GHA	2	8	M	1	1
10	S	2	GHA	2	10	M	1	1
10	S	2	GHA	2	10	M	1	1
10	S	2	GHA	2	11	M	1	1
10	S	2	GHA	2	11	M	1	1
10	S	2	GHA	2	11	M	1	1
10	S	2	GHA	2	12	M	1	1
10	S	2	GHA	2	13	M	1	1
10	S	2	GHA	2	13	M	1	1
10	S	2	GHA	2	14	M	1	1
10	S	2	GHA	2	14	M	1	1
10	S	2	GHA	2	16	M	1	1
10	S	2	GHA	2	17	M	1	1
10	S	2	GHA	2	17	M	1	1
10	S	2	GHA	2	21	M	1	1
10	S	2	GHA	2	21	M	1	1
10	S	2	GHA	2	21	M	1	1
10	S	2	GHA	2	27	M	1	1
10	S	2	GHA	2	27	M	1	1
10	S	2	GHA	2	27	M	1	1
10	S	2	GHA	2	35	M	1	1
10	S	2	GHA	2	45	M	1	1
10	S	2	GHA	2	49	M	1	1
10	C	3	GHA	1	2	F	1	1
10	C	3	GHA	1	3	F	1	1
10	C	3	GHA	1	6	F	1	1
10	C	3	GHA	1	6	F	1	1
10	C	3	GHA	1	6	F	1	1
10	C	3	GHA	1	6	F	1	1
10	C	3	GHA	1	7	F	1	1
10	C	3	GHA	1	7	F	1	1
10	C	3	GHA	1	7	F	1	1
10	C	3	GHA	1	7	F	1	1
10	C	3	GHA	1	8	F	1	1
10	C	3	GHA	1	8	F	1	1
10	C	3	GHA	1	8	F	1	1
10	C	3	GHA	1	8	F	1	1
10	C	3	GHA	1	9	F	1	1
10	C	3	GHA	1	9	F	1	1
10	C	3	GHA	1	9	F	1	1
10	C	3	GHA	1	9	F	1	1
10	C	3	GHA	1	9	F	1	1
10	C	3	GHA	1	9	F	1	1
10	C	3	GHA	1	9	F	1	1
10	C	3	GHA	1	10	F	1	1
10	C	3	GHA	1	10	F	1	1
10	C	3	GHA	1	10	F	1	1
10	C	3	GHA	1	11	F	1	1
10	C	3	GHA	1	11	F	1	1
10	C	3	GHA	1	11	F	1	1
10	C	3	GHA	1	11	F	1	1
10	C	3	GHA	1	11	F	1	1
10	C	3	GHA	1	11	F	1	1
10	C	3	GHA	1	11	F	1	1
10	C	3	GHA	1	12	F	1	1
10	C	3	GHA	1	13	F	1	1
10	C	3	GHA	1	14	F	1	1
10	C	3	GHA	1	14	F	1	1
10	C	3	GHA	1	14	F	1	1
10	C	3	GHA	1	14	F	1	1
10	C	3	GHA	1	14	F	1	1
10	C	3	GHA	1	14	F	1	1
10	C	3	GHA	1	15	F	1	1
10	C	3	GHA	1	15	F	1	1
10	C	3	GHA	1	16	F	1	1
10	C	3	GHA	1	17	F	1	1
10	C	3	GHA	1	18	F	1	1
10	C	3	GHA	1	18	F	1	1
10	C	3	GHA	1	20	F	1	1
10	C	3	GHA	1	20	F	1	1
10	C	3	GHA	1	20	F	1	1
10	C	3	GHA	1	20	F	1	1
10	C	3	GHA	1	20	F	1	1
10	C	3	GHA	1	22	F	1	1
10	C	3	GHA	1	26	F	1	1
10	C	3	GHA	1	30	F	1	1
10	C	3	GHA	1	34	F	1	1
10	C	3	GHA	1	37	F	1	1
10	C	3	GHA	1	47	F	1	1
10	C	3	GHA	1	49	F	1	1
10	C	3	GHA	1	52	F	1	1
10	C	3	GHA	1	52	F	1	1
10	C	3	GHA	1	6	M	1	1
10	C	3	GHA	1	7	M	1	1
10	C	3	GHA	1	8	M	1	1
10	C	3	GHA	1	8	M	1	1
10	C	3	GHA	1	8	M	1	1
10	C	3	GHA	1	8	M	1	1
10	C	3	GHA	1	8	M	1	1
10	C	3	GHA	1	8	M	1	1
10	C	3	GHA	1	8	M	1	1
10	C	3	GHA	1	9	M	1	1
10	C	3	GHA	1	9	M	1	1
10	C	3	GHA	1	9	M	1	1
10	C	3	GHA	1	9	M	1	1
10	C	3	GHA	1	9	M	1	1
10	C	3	GHA	1	9	M	1	1
10	C	3	GHA	1	9	M	1	1
10	C	3	GHA	1	9	M	1	1
10	C	3	GHA	1	9	M	1	1
10	C	3	GHA	1	9	M	1	1
10	C	3	GHA	1	10	M	1	1
10	C	3	GHA	1	10	M	1	1
10	C	3	GHA	1	10	M	1	1
10	C	3	GHA	1	10	M	1	1
10	C	3	GHA	1	10	M	1	1
10	C	3	GHA	1	10	M	1	1
10	C	3	GHA	1	10	M	1	1
10	C	3	GHA	1	10	M	1	1
10	C	3	GHA	1	11	M	1	1
10	C	3	GHA	1	11	M	1	1
10	C	3	GHA	1	11	M	1	1
10	C	3	GHA	1	11	M	1	1
10	C	3	GHA	1	11	M	1	1
10	C	3	GHA	1	11	M	1	1
10	C	3	GHA	1	11	M	1	1
10	C	3	GHA	1	11	M	1	1
10	C	3	GHA	1	11	M	1	1
10	C	3	GHA	1	11	M	1	1
10	C	3	GHA	1	12	M	1	1
10	C	3	GHA	1	12	M	1	1
10	C	3	GHA	1	12	M	1	1
10	C	3	GHA	1	12	M	1	1
10	C	3	GHA	1	12	M	1	1
10	C	3	GHA	1	12	M	1	1
10	C	3	GHA	1	12	M	1	1
10	C	3	GHA	1	12	M	1	1
10	C	3	GHA	1	13	M	1	1
10	C	3	GHA	1	13	M	1	1
10	C	3	GHA	1	13	M	1	1
10	C	3	GHA	1	13	M	1	1
10	C	3	GHA	1	13	M	1	1
10	C	3	GHA	1	13	M	1	1
10	C	3	GHA	1	13	M	1	1
10	C	3	GHA	1	14	M	1	1
10	C	3	GHA	1	14	M	1	1
10	C	3	GHA	1	14	M	1	1
10	C	3	GHA	1	14	M	1	1
10	C	3	GHA	1	14	M	1	1
10	C	3	GHA	1	15	M	1	1
10	C	3	GHA	1	15	M	1	1
10	C	3	GHA	1	16	M	1	1
10	C	3	GHA	1	16	M	1	1
10	C	3	GHA	1	16	M	1	1
10	C	3	GHA	1	16	M	1	1
10	C	3	GHA	1	16	M	1	1
10	C	3	GHA	1	16	M	1	1
10	C	3	GHA	1	17	M	1	1
10	C	3	GHA	1	17	M	1	1
10	C	3	GHA	1	17	M	1	1
10	C	3	GHA	1	17	M	1	1
10	C	3	GHA	1	17	M	1	1
10	C	3	GHA	1	19	M	1	1
10	C	3	GHA	1	19	M	1	1
10	C	3	GHA	1	19	M	1	1
10	C	3	GHA	1	20	M	1	1
10	C	3	GHA	1	22	M	1	1
10	C	3	GHA	1	22	M	1	1
10	C	3	GHA	1	23	M	1	1
10	C	3	GHA	1	26	M	1	1
10	C	3	GHA	1	26	M	1	1
10	C	3	GHA	1	28	M	1	1
10	C	3	GHA	1	34	M	1	1
10	C	3	GHA	1	36	M	1	1
10	C	3	GHA	1	42	M	1	1
10	C	3	GHA	1	42	M	1	1
10	C	3	GHA	1	48	M	1	1
10	C	3	GHA	1	48	M	1	1
10	C	3	GHA	1	52	M	1	1
10	C	3	GHA	2	3	F	1	1
10	C	3	GHA	2	4	F	1	1
10	C	3	GHA	2	6	F	1	1
10	C	3	GHA	2	7	F	1	1
10	C	3	GHA	2	7	F	1	1
10	C	3	GHA	2	7	F	1	1
10	C	3	GHA	2	8	F	1	1
10	C	3	GHA	2	8	F	1	1
10	C	3	GHA	2	9	F	1	1
10	C	3	GHA	2	9	F	1	1
10	C	3	GHA	2	9	F	1	1
10	C	3	GHA	2	10	F	1	1
10	C	3	GHA	2	10	F	1	1
10	C	3	GHA	2	10	F	1	1
10	C	3	GHA	2	11	F	1	1
10	C	3	GHA	2	11	F	1	1
10	C	3	GHA	2	11	F	1	1
10	C	3	GHA	2	11	F	1	1
10	C	3	GHA	2	11	F	1	1
10	C	3	GHA	2	12	F	1	1
10	C	3	GHA	2	12	F	1	1
10	C	3	GHA	2	12	F	1	1
10	C	3	GHA	2	12	F	1	1
10	C	3	GHA	2	12	F	1	1
10	C	3	GHA	2	13	F	1	1
10	C	3	GHA	2	13	F	1	1
10	C	3	GHA	2	13	F	1	1
10	C	3	GHA	2	14	F	1	1
10	C	3	GHA	2	14	F	1	1
10	C	3	GHA	2	14	F	1	1
10	C	3	GHA	2	15	F	1	1
10	C	3	GHA	2	15	F	1	1
10	C	3	GHA	2	16	F	1	1
10	C	3	GHA	2	16	F	1	1
10	C	3	GHA	2	16	F	1	1
10	C	3	GHA	2	17	F	1	1
10	C	3	GHA	2	18	F	1	1
10	C	3	GHA	2	19	F	1	1
10	C	3	GHA	2	19	F	1	1
10	C	3	GHA	2	20	F	1	1
10	C	3	GHA	2	22	F	1	1
10	C	3	GHA	2	24	F	1	1
10	C	3	GHA	2	24	F	1	1
10	C	3	GHA	2	24	F	1	1
10	C	3	GHA	2	24	F	1	1
10	C	3	GHA	2	25	F	1	1
10	C	3	GHA	2	28	F	1	1
10	C	3	GHA	2	28	F	1	1
10	C	3	GHA	2	30	F	1	1
10	C	3	GHA	2	31	F	1	1
10	C	3	GHA	2	36	F	0	1
10	C	3	GHA	2	37	F	1	1
10	C	3	GHA	2	37	F	1	1
10	C	3	GHA	2	39	F	1	1
10	C	3	GHA	2	40	F	1	1
10	C	3	GHA	2	41	F	1	1
10	C	3	GHA	2	44	F	1	1
10	C	3	GHA	2	45	F	1	1
10	C	3	GHA	2	45	F	1	1
10	C	3	GHA	2	45	F	1	1
10	C	3	GHA	2	45	F	1	1
10	C	3	GHA	2	46	F	1	1
10	C	3	GHA	2	47	F	1	1
10	C	3	GHA	2	47	F	1	1
10	C	3	GHA	2	48	F	1	1
10	C	3	GHA	2	51	F	1	1
10	C	3	GHA	2	51	F	0	1
10	C	3	GHA	2	4	M	1	1
10	C	3	GHA	2	6	M	1	1
10	C	3	GHA	2	7	M	1	1
10	C	3	GHA	2	7	M	1	1
10	C	3	GHA	2	8	M	1	1
10	C	3	GHA	2	8	M	1	1
10	C	3	GHA	2	9	M	1	1
10	C	3	GHA	2	9	M	1	1
10	C	3	GHA	2	9	M	1	1
10	C	3	GHA	2	9	M	1	1
10	C	3	GHA	2	9	M	1	1
10	C	3	GHA	2	9	M	1	1
10	C	3	GHA	2	10	M	1	1
10	C	3	GHA	2	10	M	1	1
10	C	3	GHA	2	10	M	1	1
10	C	3	GHA	2	10	M	1	1
10	C	3	GHA	2	10	M	1	1
10	C	3	GHA	2	10	M	1	1
10	C	3	GHA	2	10	M	1	1
10	C	3	GHA	2	10	M	1	1
10	C	3	GHA	2	10	M	1	1
10	C	3	GHA	2	10	M	1	1
10	C	3	GHA	2	10	M	1	1
10	C	3	GHA	2	10	M	1	1
10	C	3	GHA	2	11	M	1	1
10	C	3	GHA	2	11	M	1	1
10	C	3	GHA	2	11	M	1	1
10	C	3	GHA	2	11	M	1	1
10	C	3	GHA	2	11	M	1	1
10	C	3	GHA	2	11	M	1	1
10	C	3	GHA	2	11	M	1	1
10	C	3	GHA	2	11	M	1	1
10	C	3	GHA	2	12	M	1	1
10	C	3	GHA	2	12	M	1	1
10	C	3	GHA	2	12	M	1	1
10	C	3	GHA	2	12	M	1	1
10	C	3	GHA	2	12	M	1	1
10	C	3	GHA	2	13	M	1	1
10	C	3	GHA	2	13	M	1	1
10	C	3	GHA	2	13	M	1	1
10	C	3	GHA	2	13	M	1	1
10	C	3	GHA	2	13	M	1	1
10	C	3	GHA	2	13	M	1	1
10	C	3	GHA	2	13	M	1	1
10	C	3	GHA	2	13	M	1	1
10	C	3	GHA	2	14	M	1	1
10	C	3	GHA	2	14	M	1	1
10	C	3	GHA	2	14	M	1	1
10	C	3	GHA	2	14	M	1	1
10	C	3	GHA	2	14	M	1	1
10	C	3	GHA	2	14	M	1	1
10	C	3	GHA	2	14	M	1	1
10	C	3	GHA	2	14	M	1	1
10	C	3	GHA	2	15	M	1	1
10	C	3	GHA	2	16	M	1	1
10	C	3	GHA	2	16	M	1	1
10	C	3	GHA	2	16	M	1	1
10	C	3	GHA	2	17	M	1	1
10	C	3	GHA	2	18	M	1	1
10	C	3	GHA	2	20	M	1	1
10	C	3	GHA	2	25	M	0	1
10	C	3	GHA	2	28	M	1	1
10	C	3	GHA	2	29	M	1	1
10	C	3	GHA	2	34	M	1	1
10	C	3	GHA	2	38	M	1	1
10	C	3	GHA	2	38	M	1	1
10	C	3	GHA	2	48	M	1	1
10	C	3	GHA	2	51	M	1	1
10	C	3	GHA	2	52	M	1	1
10	C	3	GHA	2	55	M	1	1
10	S	3	GHA	1	3	F	1	1
10	S	3	GHA	1	5	F	1	1
10	S	3	GHA	1	5	F	1	1
10	S	3	GHA	1	6	F	1	1
10	S	3	GHA	1	6	F	1	1
10	S	3	GHA	1	6	F	1	1
10	S	3	GHA	1	6	F	1	1
10	S	3	GHA	1	6	F	1	1
10	S	3	GHA	1	7	F	1	1
10	S	3	GHA	1	7	F	1	1
10	S	3	GHA	1	7	F	1	1
10	S	3	GHA	1	7	F	1	1
10	S	3	GHA	1	7	F	1	1
10	S	3	GHA	1	7	F	1	1
10	S	3	GHA	1	8	F	1	1
10	S	3	GHA	1	8	F	1	1
10	S	3	GHA	1	8	F	1	1
10	S	3	GHA	1	8	F	1	1
10	S	3	GHA	1	8	F	1	1
10	S	3	GHA	1	8	F	1	1
10	S	3	GHA	1	9	F	1	1
10	S	3	GHA	1	9	F	1	1
10	S	3	GHA	1	9	F	1	1
10	S	3	GHA	1	9	F	1	1
10	S	3	GHA	1	9	F	1	1
10	S	3	GHA	1	10	F	1	1
10	S	3	GHA	1	10	F	1	1
10	S	3	GHA	1	10	F	1	1
10	S	3	GHA	1	10	F	1	1
10	S	3	GHA	1	11	F	1	1
10	S	3	GHA	1	11	F	1	1
10	S	3	GHA	1	16	F	1	1
10	S	3	GHA	1	16	F	1	1
10	S	3	GHA	1	17	F	1	1
10	S	3	GHA	1	18	F	1	1
10	S	3	GHA	1	18	F	1	1
10	S	3	GHA	1	18	F	0	1
10	S	3	GHA	1	24	F	1	1
10	S	3	GHA	1	25	F	1	1
10	S	3	GHA	1	25	F	1	1
10	S	3	GHA	1	26	F	1	1
10	S	3	GHA	1	26	F	1	1
10	S	3	GHA	1	27	F	1	1
10	S	3	GHA	1	31	F	1	1
10	S	3	GHA	1	32	F	1	1
10	S	3	GHA	1	42	F	1	1
10	S	3	GHA	1	43	F	1	1
10	S	3	GHA	1	43	F	1	1
10	S	3	GHA	1	44	F	1	1
10	S	3	GHA	1	4	M	1	1
10	S	3	GHA	1	6	M	1	1
10	S	3	GHA	1	8	M	1	1
10	S	3	GHA	1	9	M	1	1
10	S	3	GHA	1	9	M	1	1
10	S	3	GHA	1	9	M	1	1
10	S	3	GHA	1	10	M	1	1
10	S	3	GHA	1	10	M	1	1
10	S	3	GHA	1	11	M	1	1
10	S	3	GHA	1	11	M	1	1
10	S	3	GHA	1	11	M	1	1
10	S	3	GHA	1	11	M	1	1
10	S	3	GHA	1	11	M	1	1
10	S	3	GHA	1	12	M	1	1
10	S	3	GHA	1	12	M	1	1
10	S	3	GHA	1	12	M	1	1
10	S	3	GHA	1	12	M	1	1
10	S	3	GHA	1	12	M	1	1
10	S	3	GHA	1	13	M	1	1
10	S	3	GHA	1	13	M	1	1
10	S	3	GHA	1	13	M	1	1
10	S	3	GHA	1	13	M	1	1
10	S	3	GHA	1	13	M	1	1
10	S	3	GHA	1	13	M	1	1
10	S	3	GHA	1	14	M	1	1
10	S	3	GHA	1	14	M	1	1
10	S	3	GHA	1	14	M	1	1
10	S	3	GHA	1	14	M	1	1
10	S	3	GHA	1	14	M	1	1
10	S	3	GHA	1	14	M	1	1
10	S	3	GHA	1	14	M	1	1
10	S	3	GHA	1	14	M	1	1
10	S	3	GHA	1	15	M	1	1
10	S	3	GHA	1	15	M	1	1
10	S	3	GHA	1	16	M	1	1
10	S	3	GHA	1	16	M	1	1
10	S	3	GHA	1	16	M	1	1
10	S	3	GHA	1	16	M	1	1
10	S	3	GHA	1	16	M	1	1
10	S	3	GHA	1	16	M	1	1
10	S	3	GHA	1	16	M	1	1
10	S	3	GHA	1	16	M	1	1
10	S	3	GHA	1	17	M	1	1
10	S	3	GHA	1	18	M	1	1
10	S	3	GHA	1	18	M	1	1
10	S	3	GHA	1	21	M	1	1
10	S	3	GHA	1	22	M	1	1
10	S	3	GHA	1	22	M	1	1
10	S	3	GHA	1	22	M	1	1
10	S	3	GHA	1	23	M	1	1
10	S	3	GHA	1	24	M	1	1
10	S	3	GHA	1	16	M	0	1
10	S	3	GHA	1	26	M	1	1
10	S	3	GHA	1	26	M	0	1
10	S	3	GHA	1	28	M	1	1
10	S	3	GHA	1	28	M	1	1
10	S	3	GHA	1	29	M	1	1
10	S	3	GHA	1	31	M	1	1
10	S	3	GHA	1	32	M	1	1
10	S	3	GHA	1	33	M	1	1
10	S	3	GHA	1	37	M	1	1
10	S	3	GHA	1	38	M	1	1
10	S	3	GHA	1	41	M	1	1
10	S	3	GHA	1	42	M	1	1
10	S	3	GHA	1	44	M	1	1
10	S	3	GHA	1	44	M	1	1
10	S	3	GHA	1	45	M	1	1
10	S	3	GHA	1	50	M	1	1
10	S	3	GHA	1	50	M	1	1
10	S	3	GHA	1	51	M	1	1
10	S	3	GHA	1	52	M	1	1
10	S	3	GHA	2	4	F	1	1
10	S	3	GHA	2	4	F	1	1
10	S	3	GHA	2	5	F	1	1
10	S	3	GHA	2	5	F	1	1
10	S	3	GHA	2	5	F	1	1
10	S	3	GHA	2	6	F	1	1
10	S	3	GHA	2	6	F	1	1
10	S	3	GHA	2	6	F	1	1
10	S	3	GHA	2	7	F	1	1
10	S	3	GHA	2	7	F	1	1
10	S	3	GHA	2	7	F	1	1
10	S	3	GHA	2	8	F	1	1
10	S	3	GHA	2	8	F	1	1
10	S	3	GHA	2	10	F	1	1
10	S	3	GHA	2	10	F	1	1
10	S	3	GHA	2	10	F	1	1
10	S	3	GHA	2	11	F	1	1
10	S	3	GHA	2	15	F	1	1
10	S	3	GHA	2	18	F	1	1
10	S	3	GHA	2	2	M	1	1
10	S	3	GHA	2	4	M	1	1
10	S	3	GHA	2	7	M	1	1
10	S	3	GHA	2	7	M	1	1
10	S	3	GHA	2	9	M	1	1
10	S	3	GHA	2	9	M	1	1
10	S	3	GHA	2	9	M	1	1
10	S	3	GHA	2	9	M	1	1
10	S	3	GHA	2	9	M	1	1
10	S	3	GHA	2	9	M	1	1
10	S	3	GHA	2	9	M	1	1
10	S	3	GHA	2	9	M	1	1
10	S	3	GHA	2	9	M	1	1
10	S	3	GHA	2	10	M	1	1
10	S	3	GHA	2	10	M	1	1
10	S	3	GHA	2	10	M	1	1
10	S	3	GHA	2	10	M	1	1
10	S	3	GHA	2	10	M	1	1
10	S	3	GHA	2	10	M	1	1
10	S	3	GHA	2	11	M	1	1
10	S	3	GHA	2	11	M	1	1
10	S	3	GHA	2	11	M	1	1
10	S	3	GHA	2	11	M	1	1
10	S	3	GHA	2	11	M	1	1
10	S	3	GHA	2	11	M	1	1
10	S	3	GHA	2	11	M	1	1
10	S	3	GHA	2	12	M	1	1
10	S	3	GHA	2	12	M	1	1
10	S	3	GHA	2	12	M	1	1
10	S	3	GHA	2	12	M	1	1
10	S	3	GHA	2	12	M	1	1
10	S	3	GHA	2	12	M	1	1
10	S	3	GHA	2	12	M	1	1
10	S	3	GHA	2	12	M	1	1
10	S	3	GHA	2	12	M	1	1
10	S	3	GHA	2	13	M	1	1
10	S	3	GHA	2	13	M	1	1
10	S	3	GHA	2	13	M	1	1
10	S	3	GHA	2	13	M	1	1
10	S	3	GHA	2	13	M	1	1
10	S	3	GHA	2	14	M	1	1
10	S	3	GHA	2	14	M	1	1
10	S	3	GHA	2	14	M	1	1
10	S	3	GHA	2	14	M	1	1
10	S	3	GHA	2	14	M	1	1
10	S	3	GHA	2	14	M	1	1
10	S	3	GHA	2	14	M	1	1
10	S	3	GHA	2	14	M	1	1
10	S	3	GHA	2	15	M	1	1
10	S	3	GHA	2	15	M	1	1
10	S	3	GHA	2	15	M	1	1
10	S	3	GHA	2	15	M	1	1
10	S	3	GHA	2	15	M	1	1
10	S	3	GHA	2	15	M	1	1
10	S	3	GHA	2	15	M	1	1
10	S	3	GHA	2	16	M	1	1
10	S	3	GHA	2	16	M	1	1
10	S	3	GHA	2	16	M	1	1
10	S	3	GHA	2	16	M	1	1
10	S	3	GHA	2	16	M	1	1
10	S	3	GHA	2	16	M	1	1
10	S	3	GHA	2	16	M	1	1
10	S	3	GHA	2	16	M	1	1
10	S	3	GHA	2	17	M	1	1
10	S	3	GHA	2	17	M	1	1
10	S	3	GHA	2	17	M	1	1
10	S	3	GHA	2	18	M	1	1
10	S	3	GHA	2	18	M	1	1
10	S	3	GHA	2	20	M	1	1
10	S	3	GHA	2	20	M	1	1
10	S	3	GHA	2	20	M	1	1
10	S	3	GHA	2	22	M	1	1
10	S	3	GHA	2	22	M	1	1
10	S	3	GHA	2	22	M	1	1
10	S	3	GHA	2	22	M	1	1
10	S	3	GHA	2	22	M	1	1
10	S	3	GHA	2	23	M	1	1
10	S	3	GHA	2	23	M	1	1
10	S	3	GHA	2	24	M	1	1
10	S	3	GHA	2	24	M	1	1
10	S	3	GHA	2	31	M	1	1
10	S	3	GHA	2	33	M	1	1
10	S	3	GHA	2	33	M	1	1
10	S	3	GHA	2	34	M	1	1
10	S	3	GHA	2	37	M	1	1
10	S	3	GHA	2	37	M	1	1
10	S	3	GHA	2	39	M	1	1
10	S	3	GHA	2	40	M	1	1
10	S	3	GHA	2	42	M	1	1
10	S	3	GHA	2	43	M	1	1
10	S	3	GHA	2	44	M	1	1
10	S	3	GHA	2	44	M	1	1
10	S	3	GHA	2	47	M	1	1
10	S	3	GHA	2	48	M	1	1
10	S	3	GHA	2	20	M	0	1
10	S	3	GHA	2	16	M	0	1
10	S	3	GHA	2	16	M	0	1
10	C	4	GHA	1	3	F	1	1
10	C	4	GHA	1	3	F	1	1
10	C	4	GHA	1	5	F	1	1
10	C	4	GHA	1	5	F	1	1
10	C	4	GHA	1	5	F	1	1
10	C	4	GHA	1	5	F	1	1
10	C	4	GHA	1	5	F	1	1
10	C	4	GHA	1	5	F	1	1
10	C	4	GHA	1	5	F	1	1
10	C	4	GHA	1	5	F	1	1
10	C	4	GHA	1	5	F	1	1
10	C	4	GHA	1	5	F	1	1
10	C	4	GHA	1	6	F	1	1
10	C	4	GHA	1	6	F	1	1
10	C	4	GHA	1	6	F	1	1
10	C	4	GHA	1	7	F	1	1
10	C	4	GHA	1	7	F	1	1
10	C	4	GHA	1	7	F	1	1
10	C	4	GHA	1	7	F	1	1
10	C	4	GHA	1	7	F	1	1
10	C	4	GHA	1	7	F	1	1
10	C	4	GHA	1	8	F	1	1
10	C	4	GHA	1	8	F	1	1
10	C	4	GHA	1	8	F	1	1
10	C	4	GHA	1	8	F	1	1
10	C	4	GHA	1	9	F	1	1
10	C	4	GHA	1	9	F	1	1
10	C	4	GHA	1	10	F	1	1
10	C	4	GHA	1	10	F	1	1
10	C	4	GHA	1	10	F	1	1
10	C	4	GHA	1	10	F	1	1
10	C	4	GHA	1	10	F	1	1
10	C	4	GHA	1	11	F	1	1
10	C	4	GHA	1	11	F	1	1
10	C	4	GHA	1	11	F	1	1
10	C	4	GHA	1	12	F	1	1
10	C	4	GHA	1	12	F	1	1
10	C	4	GHA	1	12	F	1	1
10	C	4	GHA	1	14	F	1	1
10	C	4	GHA	1	15	F	1	1
10	C	4	GHA	1	16	F	1	1
10	C	4	GHA	1	16	F	1	1
10	C	4	GHA	1	17	F	1	1
10	C	4	GHA	1	17	F	1	1
10	C	4	GHA	1	19	F	1	1
10	C	4	GHA	1	21	F	1	1
10	C	4	GHA	1	22	F	1	1
10	C	4	GHA	1	25	F	1	1
10	C	4	GHA	1	26	F	1	1
10	C	4	GHA	1	29	F	1	1
10	C	4	GHA	1	29	F	1	1
10	C	4	GHA	1	30	F	1	1
10	C	4	GHA	1	31	F	1	1
10	C	4	GHA	1	31	F	1	1
10	C	4	GHA	1	38	F	1	1
10	C	4	GHA	1	39	F	1	1
10	C	4	GHA	1	39	F	1	1
10	C	4	GHA	1	40	F	1	1
10	C	4	GHA	1	52	F	1	1
10	C	4	GHA	1	5	M	1	1
10	C	4	GHA	1	5	M	1	1
10	C	4	GHA	1	7	M	1	1
10	C	4	GHA	1	9	M	0	1
10	C	4	GHA	1	8	M	1	1
10	C	4	GHA	1	8	M	1	1
10	C	4	GHA	1	9	M	0	1
10	C	4	GHA	1	9	M	0	1
10	C	4	GHA	1	9	M	1	1
10	C	4	GHA	1	9	M	1	1
10	C	4	GHA	1	9	M	1	1
10	C	4	GHA	1	9	M	1	1
10	C	4	GHA	1	9	M	1	1
10	C	4	GHA	1	9	M	1	1
10	C	4	GHA	1	9	M	1	1
10	C	4	GHA	1	9	M	1	1
10	C	4	GHA	1	9	M	1	1
10	C	4	GHA	1	9	M	1	1
10	C	4	GHA	1	9	M	1	1
10	C	4	GHA	1	10	M	1	1
10	C	4	GHA	1	10	M	1	1
10	C	4	GHA	1	11	M	1	1
10	C	4	GHA	1	11	M	1	1
10	C	4	GHA	1	11	M	1	1
10	C	4	GHA	1	11	M	1	1
10	C	4	GHA	1	11	M	1	1
10	C	4	GHA	1	11	M	1	1
10	C	4	GHA	1	11	M	1	1
10	C	4	GHA	1	11	M	1	1
10	C	4	GHA	1	11	M	1	1
10	C	4	GHA	1	11	M	1	1
10	C	4	GHA	1	12	M	1	1
10	C	4	GHA	1	12	M	1	1
10	C	4	GHA	1	12	M	1	1
10	C	4	GHA	1	12	M	1	1
10	C	4	GHA	1	12	M	1	1
10	C	4	GHA	1	12	M	1	1
10	C	4	GHA	1	12	M	1	1
10	C	4	GHA	1	12	M	1	1
10	C	4	GHA	1	12	M	1	1
10	C	4	GHA	1	13	M	1	1
10	C	4	GHA	1	13	M	1	1
10	C	4	GHA	1	13	M	1	1
10	C	4	GHA	1	13	M	1	1
10	C	4	GHA	1	13	M	1	1
10	C	4	GHA	1	14	M	1	1
10	C	4	GHA	1	14	M	1	1
10	C	4	GHA	1	14	M	1	1
10	C	4	GHA	1	14	M	1	1
10	C	4	GHA	1	14	M	1	1
10	C	4	GHA	1	15	M	1	1
10	C	4	GHA	1	16	M	1	1
10	C	4	GHA	1	17	M	1	1
10	C	4	GHA	1	17	M	1	1
10	C	4	GHA	1	17	M	1	1
10	C	4	GHA	1	18	M	1	1
10	C	4	GHA	1	20	M	1	1
10	C	4	GHA	1	22	M	1	1
10	C	4	GHA	1	23	M	1	1
10	C	4	GHA	1	29	M	1	1
10	C	4	GHA	1	29	M	1	1
10	C	4	GHA	1	34	M	1	1
10	C	4	GHA	1	39	M	1	1
10	C	4	GHA	1	41	M	1	1
10	C	4	GHA	1	49	M	1	1
10	C	4	GHA	2	4	F	1	1
10	C	4	GHA	2	5	F	1	1
10	C	4	GHA	2	5	F	1	1
10	C	4	GHA	2	5	F	1	1
10	C	4	GHA	2	5	F	1	1
10	C	4	GHA	2	5	F	1	1
10	C	4	GHA	2	5	F	1	1
10	C	4	GHA	2	6	F	1	1
10	C	4	GHA	2	6	F	1	1
10	C	4	GHA	2	6	F	1	1
10	C	4	GHA	2	6	F	1	1
10	C	4	GHA	2	6	F	1	1
10	C	4	GHA	2	6	F	1	1
10	C	4	GHA	2	7	F	1	1
10	C	4	GHA	2	7	F	1	1
10	C	4	GHA	2	8	F	1	1
10	C	4	GHA	2	8	F	1	1
10	C	4	GHA	2	8	F	1	1
10	C	4	GHA	2	8	F	1	1
10	C	4	GHA	2	8	F	1	1
10	C	4	GHA	2	8	F	1	1
10	C	4	GHA	2	8	F	1	1
10	C	4	GHA	2	9	F	1	1
10	C	4	GHA	2	10	F	1	1
10	C	4	GHA	2	10	F	1	1
10	C	4	GHA	2	10	F	1	1
10	C	4	GHA	2	10	F	1	1
10	C	4	GHA	2	10	F	1	1
10	C	4	GHA	2	10	F	1	1
10	C	4	GHA	2	11	F	1	1
10	C	4	GHA	2	11	F	1	1
10	C	4	GHA	2	11	F	1	1
10	C	4	GHA	2	13	F	1	1
10	C	4	GHA	2	13	F	1	1
10	C	4	GHA	2	13	F	1	1
10	C	4	GHA	2	14	F	1	1
10	C	4	GHA	2	15	F	1	1
10	C	4	GHA	2	15	F	1	1
10	C	4	GHA	2	16	F	1	1
10	C	4	GHA	2	16	F	1	1
10	C	4	GHA	2	17	F	1	1
10	C	4	GHA	2	19	F	1	1
10	C	4	GHA	2	19	F	1	1
10	C	4	GHA	2	19	F	1	1
10	C	4	GHA	2	20	F	1	1
10	C	4	GHA	2	20	F	1	1
10	C	4	GHA	2	22	F	1	1
10	C	4	GHA	2	22	F	1	1
10	C	4	GHA	2	25	F	1	1
10	C	4	GHA	2	26	F	1	1
10	C	4	GHA	2	28	F	1	1
10	C	4	GHA	2	28	F	1	1
10	C	4	GHA	2	28	F	1	1
10	C	4	GHA	2	31	F	1	1
10	C	4	GHA	2	31	F	1	1
10	C	4	GHA	2	32	F	1	1
10	C	4	GHA	2	34	F	1	1
10	C	4	GHA	2	40	F	1	1
10	C	4	GHA	2	41	F	1	1
10	C	4	GHA	2	5	M	1	1
10	C	4	GHA	2	5	M	0	1
10	C	4	GHA	2	6	M	1	1
10	C	4	GHA	2	8	M	1	1
10	C	4	GHA	2	8	M	1	1
10	C	4	GHA	2	8	M	1	1
10	C	4	GHA	2	8	M	1	1
10	C	4	GHA	2	8	M	1	1
10	C	4	GHA	2	9	M	1	1
10	C	4	GHA	2	9	M	1	1
10	C	4	GHA	2	9	M	1	1
10	C	4	GHA	2	9	M	1	1
10	C	4	GHA	2	9	M	1	1
10	C	4	GHA	2	10	M	1	1
10	C	4	GHA	2	10	M	1	1
10	C	4	GHA	2	10	M	1	1
10	C	4	GHA	2	10	M	1	1
10	C	4	GHA	2	10	M	1	1
10	C	4	GHA	2	11	M	1	1
10	C	4	GHA	2	11	M	1	1
10	C	4	GHA	2	11	M	1	1
10	C	4	GHA	2	11	M	1	1
10	C	4	GHA	2	11	M	1	1
10	C	4	GHA	2	11	M	1	1
10	C	4	GHA	2	11	M	1	1
10	C	4	GHA	2	11	M	1	1
10	C	4	GHA	2	11	M	1	1
10	C	4	GHA	2	12	M	1	1
10	C	4	GHA	2	12	M	1	1
10	C	4	GHA	2	12	M	1	1
10	C	4	GHA	2	12	M	1	1
10	C	4	GHA	2	12	M	1	1
10	C	4	GHA	2	12	M	1	1
10	C	4	GHA	2	13	M	1	1
10	C	4	GHA	2	13	M	1	1
10	C	4	GHA	2	13	M	0	1
10	C	4	GHA	2	14	M	1	1
10	C	4	GHA	2	14	M	1	1
10	C	4	GHA	2	14	M	1	1
10	C	4	GHA	2	14	M	1	1
10	C	4	GHA	2	15	M	1	1
10	C	4	GHA	2	16	M	0	1
10	C	4	GHA	2	16	M	1	1
10	C	4	GHA	2	16	M	1	1
10	C	4	GHA	2	16	M	1	1
10	C	4	GHA	2	21	M	1	1
10	C	4	GHA	2	29	M	1	1
10	C	4	GHA	2	31	M	1	1
10	C	4	GHA	2	34	M	1	1
10	C	4	GHA	2	48	M	1	1
10	C	4	GHA	2	49	M	1	1
10	S	4	GHA	1	3	F	1	1
10	S	4	GHA	1	5	F	1	1
10	S	4	GHA	1	5	F	1	1
10	S	4	GHA	1	5	F	1	1
10	S	4	GHA	1	5	F	1	1
10	S	4	GHA	1	6	F	1	1
10	S	4	GHA	1	6	F	1	1
10	S	4	GHA	1	6	F	1	1
10	S	4	GHA	1	6	F	1	1
10	S	4	GHA	1	6	F	1	1
10	S	4	GHA	1	6	F	1	1
10	S	4	GHA	1	7	F	1	1
10	S	4	GHA	1	7	F	1	1
10	S	4	GHA	1	7	F	1	1
10	S	4	GHA	1	7	F	1	1
10	S	4	GHA	1	8	F	1	1
10	S	4	GHA	1	8	F	1	1
10	S	4	GHA	1	8	F	1	1
10	S	4	GHA	1	9	F	1	1
10	S	4	GHA	1	10	F	1	1
10	S	4	GHA	1	11	F	1	1
10	S	4	GHA	1	13	F	1	1
10	S	4	GHA	1	14	F	1	1
10	S	4	GHA	1	14	F	1	1
10	S	4	GHA	1	14	F	1	1
10	S	4	GHA	1	15	F	1	1
10	S	4	GHA	1	15	F	1	1
10	S	4	GHA	1	16	F	1	1
10	S	4	GHA	1	17	F	1	1
10	S	4	GHA	1	17	F	1	1
10	S	4	GHA	1	18	F	1	1
10	S	4	GHA	1	18	F	1	1
10	S	4	GHA	1	19	F	1	1
10	S	4	GHA	1	20	F	1	1
10	S	4	GHA	1	22	F	1	1
10	S	4	GHA	1	29	F	1	1
10	S	4	GHA	1	29	F	1	1
10	S	4	GHA	1	29	F	1	1
10	S	4	GHA	1	30	F	1	1
10	S	4	GHA	1	34	F	1	1
10	S	4	GHA	1	34	F	1	1
10	S	4	GHA	1	37	F	1	1
10	S	4	GHA	1	41	F	1	1
10	S	4	GHA	1	41	F	1	1
10	S	4	GHA	1	3	M	1	1
10	S	4	GHA	1	8	M	1	1
10	S	4	GHA	1	9	M	1	1
10	S	4	GHA	1	10	M	1	1
10	S	4	GHA	1	10	M	1	1
10	S	4	GHA	1	10	M	1	1
10	S	4	GHA	1	10	M	1	1
10	S	4	GHA	1	10	M	1	1
10	S	4	GHA	1	11	M	1	1
10	S	4	GHA	1	11	M	1	1
10	S	4	GHA	1	11	M	1	1
10	S	4	GHA	1	11	M	1	1
10	S	4	GHA	1	11	M	1	1
10	S	4	GHA	1	11	M	1	1
10	S	4	GHA	1	12	M	1	1
10	S	4	GHA	1	12	M	1	1
10	S	4	GHA	1	12	M	1	1
10	S	4	GHA	1	12	M	1	1
10	S	4	GHA	1	12	M	1	1
10	S	4	GHA	1	13	M	1	1
10	S	4	GHA	1	13	M	1	1
10	S	4	GHA	1	13	M	1	1
10	S	4	GHA	1	13	M	1	1
10	S	4	GHA	1	13	M	1	1
10	S	4	GHA	1	13	M	1	1
10	S	4	GHA	1	13	M	1	1
10	S	4	GHA	1	14	M	1	1
10	S	4	GHA	1	14	M	1	1
10	S	4	GHA	1	14	M	1	1
10	S	4	GHA	1	14	M	1	1
10	S	4	GHA	1	14	M	1	1
10	S	4	GHA	1	15	M	1	1
10	S	4	GHA	1	16	M	1	1
10	S	4	GHA	1	16	M	1	1
10	S	4	GHA	1	16	M	1	1
10	S	4	GHA	1	17	M	1	1
10	S	4	GHA	1	17	M	1	1
10	S	4	GHA	1	17	M	1	1
10	S	4	GHA	1	17	M	1	1
10	S	4	GHA	1	18	M	1	1
10	S	4	GHA	1	18	M	1	1
10	S	4	GHA	1	19	M	1	1
10	S	4	GHA	1	19	M	1	1
10	S	4	GHA	1	19	M	1	1
10	S	4	GHA	1	17	M	0	1
10	S	4	GHA	1	21	M	1	1
10	S	4	GHA	1	23	M	1	1
10	S	4	GHA	1	24	M	1	1
10	S	4	GHA	1	24	M	1	1
10	S	4	GHA	1	25	M	1	1
10	S	4	GHA	1	28	M	1	1
10	S	4	GHA	1	31	M	1	1
10	S	4	GHA	1	31	M	1	1
10	S	4	GHA	1	32	M	1	1
10	S	4	GHA	1	32	M	1	1
10	S	4	GHA	1	32	M	1	1
10	S	4	GHA	1	33	M	1	1
10	S	4	GHA	1	37	M	1	1
10	S	4	GHA	1	40	M	1	1
10	S	4	GHA	1	40	M	1	1
10	S	4	GHA	1	42	M	1	1
10	S	4	GHA	1	42	M	1	1
10	S	4	GHA	1	43	M	1	1
10	S	4	GHA	1	44	M	1	1
10	S	4	GHA	1	48	M	1	1
10	S	4	GHA	2	3	F	1	1
10	S	4	GHA	2	4	F	1	1
10	S	4	GHA	2	5	F	1	1
10	S	4	GHA	2	5	F	1	1
10	S	4	GHA	2	5	F	1	1
10	S	4	GHA	2	5	F	1	1
10	S	4	GHA	2	5	F	1	1
10	S	4	GHA	2	6	F	1	1
10	S	4	GHA	2	6	F	1	1
10	S	4	GHA	2	6	F	1	1
10	S	4	GHA	2	6	F	1	1
10	S	4	GHA	2	7	F	1	1
10	S	4	GHA	2	7	F	1	1
10	S	4	GHA	2	7	F	1	1
10	S	4	GHA	2	7	F	1	1
10	S	4	GHA	2	7	F	1	1
10	S	4	GHA	2	7	F	1	1
10	S	4	GHA	2	7	F	1	1
10	S	4	GHA	2	7	F	1	1
10	S	4	GHA	2	8	F	1	1
10	S	4	GHA	2	9	F	1	1
10	S	4	GHA	2	10	F	1	1
10	S	4	GHA	2	11	F	1	1
10	S	4	GHA	2	11	F	1	1
10	S	4	GHA	2	11	F	1	1
10	S	4	GHA	2	12	F	1	1
10	S	4	GHA	2	12	F	1	1
10	S	4	GHA	2	12	F	1	1
10	S	4	GHA	2	14	F	1	1
10	S	4	GHA	2	15	F	1	1
10	S	4	GHA	2	16	F	1	1
10	S	4	GHA	2	16	F	1	1
10	S	4	GHA	2	19	F	1	1
10	S	4	GHA	2	19	F	1	1
10	S	4	GHA	2	20	F	1	1
10	S	4	GHA	2	20	F	1	1
10	S	4	GHA	2	21	F	1	1
10	S	4	GHA	2	21	F	1	1
10	S	4	GHA	2	21	F	1	1
10	S	4	GHA	2	23	F	1	1
10	S	4	GHA	2	23	F	1	1
10	S	4	GHA	2	27	F	1	1
10	S	4	GHA	2	30	F	1	1
10	S	4	GHA	2	32	F	1	1
10	S	4	GHA	2	34	F	1	1
10	S	4	GHA	2	39	F	1	1
10	S	4	GHA	2	46	F	1	1
10	S	4	GHA	2	49	F	1	1
10	S	4	GHA	2	49	F	1	1
10	S	4	GHA	2	50	F	1	1
10	S	4	GHA	2	51	F	1	1
10	S	4	GHA	2	6	M	1	1
10	S	4	GHA	2	8	M	1	1
10	S	4	GHA	2	9	M	1	1
10	S	4	GHA	2	9	M	1	1
10	S	4	GHA	2	9	M	1	1
10	S	4	GHA	2	9	M	1	1
10	S	4	GHA	2	9	M	1	1
10	S	4	GHA	2	9	M	1	1
10	S	4	GHA	2	9	M	1	1
10	S	4	GHA	2	10	M	1	1
10	S	4	GHA	2	10	M	1	1
10	S	4	GHA	2	10	M	1	1
10	S	4	GHA	2	10	M	1	1
10	S	4	GHA	2	10	M	1	1
10	S	4	GHA	2	10	M	1	1
10	S	4	GHA	2	11	M	1	1
10	S	4	GHA	2	11	M	1	1
10	S	4	GHA	2	11	M	1	1
10	S	4	GHA	2	11	M	1	1
10	S	4	GHA	2	11	M	1	1
10	S	4	GHA	2	11	M	1	1
10	S	4	GHA	2	12	M	1	1
10	S	4	GHA	2	12	M	1	1
10	S	4	GHA	2	12	M	1	1
10	S	4	GHA	2	12	M	1	1
10	S	4	GHA	2	12	M	1	1
10	S	4	GHA	2	12	M	1	1
10	S	4	GHA	2	13	M	1	1
10	S	4	GHA	2	13	M	1	1
10	S	4	GHA	2	13	M	1	1
10	S	4	GHA	2	13	M	1	1
10	S	4	GHA	2	13	M	1	1
10	S	4	GHA	2	13	M	1	1
10	S	4	GHA	2	13	M	1	1
10	S	4	GHA	2	13	M	1	1
10	S	4	GHA	2	13	M	1	1
10	S	4	GHA	2	14	M	1	1
10	S	4	GHA	2	15	M	1	1
10	S	4	GHA	2	15	M	1	1
10	S	4	GHA	2	16	M	1	1
10	S	4	GHA	2	16	M	1	1
10	S	4	GHA	2	16	M	1	1
10	S	4	GHA	2	16	M	1	1
10	S	4	GHA	2	17	M	1	1
10	S	4	GHA	2	17	M	1	1
10	S	4	GHA	2	17	M	1	1
10	S	4	GHA	2	17	M	1	1
10	S	4	GHA	2	17	M	1	1
10	S	4	GHA	2	18	M	1	1
10	S	4	GHA	2	18	M	1	1
10	S	4	GHA	2	19	M	1	1
10	S	4	GHA	2	16	M	0	1
10	S	4	GHA	2	22	M	1	1
10	S	4	GHA	2	24	M	0	1
10	S	4	GHA	2	24	M	0	1
10	S	4	GHA	2	24	M	1	1
10	S	4	GHA	2	24	M	1	1
10	S	4	GHA	2	30	M	1	1
10	S	4	GHA	2	33	M	0	1
10	S	4	GHA	2	33	M	1	1
10	S	4	GHA	2	33	M	1	1
10	S	4	GHA	2	35	M	0	1
10	S	4	GHA	2	37	M	1	1
10	S	4	GHA	2	38	M	1	1
10	S	4	GHA	2	40	M	1	1
10	S	4	GHA	2	41	M	1	1
10	S	4	GHA	2	46	M	1	1
10	S	4	GHA	2	50	M	1	1
10	S	4	GHA	2	51	M	1	1
19	C	1	GHA	1	4	F	1	3
19	C	1	GHA	1	5	F	1	4
19	C	1	GHA	1	6	F	1	4
19	C	1	GHA	1	7	F	1	2
19	C	1	GHA	1	8	F	1	13
19	C	1	GHA	1	9	F	1	6
19	C	1	GHA	1	10	F	1	11
19	C	1	GHA	1	11	F	1	4
19	C	1	GHA	1	12	F	1	4
19	C	1	GHA	1	14	F	1	1
19	C	1	GHA	1	15	F	1	3
19	C	1	GHA	1	16	F	1	1
19	C	1	GHA	1	17	F	1	4
19	C	1	GHA	1	18	F	1	2
19	C	1	GHA	1	20	F	1	2
19	C	1	GHA	1	21	F	1	1
19	C	1	GHA	1	23	F	1	1
19	C	1	GHA	1	29	F	1	4
19	C	1	GHA	1	31	F	1	1
19	C	1	GHA	1	37	F	1	1
19	C	1	GHA	1	50	F	1	1
19	C	1	GHA	1	54	F	1	1
19	C	1	GHA	1	4	M	1	1
19	C	1	GHA	1	5	M	1	1
19	C	1	GHA	1	6	M	1	7
19	C	1	GHA	1	7	M	1	17
19	C	1	GHA	1	8	M	1	10
19	C	1	GHA	1	9	M	1	3
19	C	1	GHA	1	10	M	1	6
19	C	1	GHA	1	12	M	1	3
19	C	1	GHA	1	15	M	1	2
19	C	1	GHA	1	17	M	1	1
19	C	1	GHA	1	19	M	1	1
19	S	1	GHA	1	4	F	1	4
19	S	1	GHA	1	6	F	1	1
19	S	1	GHA	1	7	F	1	1
19	S	1	GHA	1	8	F	1	1
19	S	1	GHA	1	9	F	1	2
19	S	1	GHA	1	10	F	1	2
19	S	1	GHA	1	12	F	1	2
19	S	1	GHA	1	14	F	1	3
19	S	1	GHA	1	15	F	1	6
19	S	1	GHA	1	16	F	1	1
19	S	1	GHA	1	18	F	1	3
19	S	1	GHA	1	19	F	1	1
19	S	1	GHA	1	20	F	1	3
19	S	1	GHA	1	21	F	1	2
19	S	1	GHA	1	22	F	1	2
19	S	1	GHA	1	23	F	1	1
19	S	1	GHA	1	26	F	1	5
19	S	1	GHA	1	27	F	1	3
19	S	1	GHA	1	30	F	1	1
19	S	1	GHA	1	31	F	1	12
19	S	1	GHA	1	32	F	1	11
19	S	1	GHA	1	36	F	1	1
19	S	1	GHA	1	39	F	1	1
19	S	1	GHA	1	42	F	1	2
19	S	1	GHA	1	49	F	1	1
19	S	1	GHA	1	50	F	1	1
19	S	1	GHA	1	53	F	1	1
19	S	1	GHA	1	55	F	1	1
19	S	1	GHA	1	57	F	1	4
19	S	1	GHA	1	4	M	1	1
19	S	1	GHA	1	5	M	1	1
19	S	1	GHA	1	6	M	1	1
19	S	1	GHA	1	8	M	1	5
19	S	1	GHA	1	9	M	1	5
19	S	1	GHA	1	10	M	1	2
19	S	1	GHA	1	12	M	1	2
19	S	1	GHA	1	13	M	1	4
19	S	1	GHA	1	14	M	1	5
19	S	1	GHA	1	15	M	1	5
19	S	1	GHA	1	16	M	1	3
19	S	1	GHA	1	17	M	1	2
19	S	1	GHA	1	18	M	1	3
19	S	1	GHA	1	19	M	1	2
19	S	1	GHA	1	20	M	1	2
19	S	1	GHA	1	22	M	1	2
19	S	1	GHA	1	23	M	1	1
19	S	1	GHA	1	24	M	1	1
19	S	1	GHA	1	26	M	1	1
19	S	1	GHA	1	31	M	1	9
19	C	2	GHA	1	2	F	1	1
19	C	2	GHA	1	4	F	1	1
19	C	2	GHA	1	5	F	1	4
19	C	2	GHA	1	6	F	1	4
19	C	2	GHA	1	7	F	1	5
19	C	2	GHA	1	8	F	1	6
19	C	2	GHA	1	9	F	1	2
19	C	2	GHA	1	10	F	1	5
19	C	2	GHA	1	11	F	1	1
19	C	2	GHA	1	12	F	1	2
19	C	2	GHA	1	13	F	1	2
19	C	2	GHA	1	14	F	1	1
19	C	2	GHA	1	15	F	1	1
19	C	2	GHA	1	18	F	1	1
19	C	2	GHA	1	19	F	1	3
19	C	2	GHA	1	20	F	1	4
19	C	2	GHA	1	21	F	1	3
19	C	2	GHA	1	24	F	1	1
19	C	2	GHA	1	25	F	1	4
19	C	2	GHA	1	26	F	1	2
19	C	2	GHA	1	29	F	1	1
19	C	2	GHA	1	30	F	1	1
19	C	2	GHA	1	31	F	1	2
19	C	2	GHA	1	32	F	1	2
19	C	2	GHA	1	35	F	1	1
19	C	2	GHA	1	36	F	1	1
19	C	2	GHA	1	37	F	1	1
19	C	2	GHA	1	40	F	1	1
19	C	2	GHA	1	47	F	1	1
19	C	2	GHA	1	55	F	1	1
19	C	2	GHA	1	4	M	1	1
19	C	2	GHA	1	6	M	1	1
19	C	2	GHA	1	7	M	1	1
19	C	2	GHA	1	8	M	1	3
19	C	2	GHA	1	9	M	1	10
19	C	2	GHA	1	10	M	1	4
19	C	2	GHA	1	12	M	1	10
19	C	2	GHA	1	13	M	1	3
19	C	2	GHA	1	14	M	1	3
19	C	2	GHA	1	15	M	1	5
19	C	2	GHA	1	16	M	1	1
19	C	2	GHA	1	17	M	1	1
19	C	2	GHA	1	18	M	1	1
19	C	2	GHA	1	19	M	1	1
19	C	2	GHA	1	20	M	1	2
19	C	2	GHA	1	21	M	1	1
19	C	2	GHA	1	27	M	1	1
19	C	2	GHA	1	33	M	1	1
19	C	2	GHA	1	40	M	1	1
19	S	2	GHA	1	4	F	1	2
19	S	2	GHA	1	5	F	1	2
19	S	2	GHA	1	6	F	1	1
19	S	2	GHA	1	7	F	1	6
19	S	2	GHA	1	8	F	1	4
19	S	2	GHA	1	9	F	1	5
19	S	2	GHA	1	10	F	1	3
19	S	2	GHA	1	11	F	1	1
19	S	2	GHA	1	12	F	1	1
19	S	2	GHA	1	13	F	1	4
19	S	2	GHA	1	15	F	1	2
19	S	2	GHA	1	16	F	1	2
19	S	2	GHA	1	17	F	1	1
19	S	2	GHA	1	18	F	1	2
19	S	2	GHA	1	20	F	1	1
19	S	2	GHA	1	21	F	1	3
19	S	2	GHA	1	22	F	1	1
19	S	2	GHA	1	23	F	1	2
19	S	2	GHA	1	24	F	1	2
19	S	2	GHA	1	25	F	1	1
19	S	2	GHA	1	28	F	1	1
19	S	2	GHA	1	29	F	1	1
19	S	2	GHA	1	30	F	1	1
19	S	2	GHA	1	31	F	1	7
19	S	2	GHA	1	32	F	1	7
19	S	2	GHA	1	36	F	1	1
19	S	2	GHA	1	37	F	1	1
19	S	2	GHA	1	39	F	1	2
19	S	2	GHA	1	42	F	1	2
19	S	2	GHA	1	49	F	1	1
19	S	2	GHA	1	50	F	1	1
19	S	2	GHA	1	52	F	1	1
19	S	2	GHA	1	55	F	1	2
19	S	2	GHA	1	60	F	1	1
19	S	2	GHA	1	61	F	1	1
19	S	2	GHA	1	63	F	1	1
19	S	2	GHA	1	64	F	1	2
19	S	2	GHA	1	4	M	1	1
19	S	2	GHA	1	7	M	1	1
19	S	2	GHA	1	8	M	1	5
19	S	2	GHA	1	10	M	1	2
19	S	2	GHA	1	12	M	1	6
19	S	2	GHA	1	13	M	1	4
19	S	2	GHA	1	14	M	1	4
19	S	2	GHA	1	15	M	1	5
19	S	2	GHA	1	16	M	1	6
19	S	2	GHA	1	17	M	1	4
19	S	2	GHA	1	18	M	1	3
19	S	2	GHA	1	19	M	1	2
19	S	2	GHA	1	20	M	1	2
19	S	2	GHA	1	21	M	1	1
19	S	2	GHA	1	23	M	1	1
19	S	2	GHA	1	25	M	1	3
19	S	2	GHA	1	29	M	1	1
19	S	2	GHA	1	31	M	1	2
19	C	3	GHA	1	3	F	1	1
19	C	3	GHA	1	4	F	1	3
19	C	3	GHA	1	5	F	1	2
19	C	3	GHA	1	6	F	1	4
19	C	3	GHA	1	7	F	1	8
19	C	3	GHA	1	8	F	1	7
19	C	3	GHA	1	9	F	1	8
19	C	3	GHA	1	10	F	1	8
19	C	3	GHA	1	11	F	1	2
19	C	3	GHA	1	13	F	1	6
19	C	3	GHA	1	14	F	1	3
19	C	3	GHA	1	15	F	1	1
19	C	3	GHA	1	17	F	1	3
19	C	3	GHA	1	18	F	1	1
19	C	3	GHA	1	19	F	1	1
19	C	3	GHA	1	20	F	1	3
19	C	3	GHA	1	22	F	1	3
19	C	3	GHA	1	24	F	1	3
19	C	3	GHA	1	25	F	1	1
19	C	3	GHA	1	27	F	1	2
19	C	3	GHA	1	28	F	1	1
19	C	3	GHA	1	31	F	1	2
19	C	3	GHA	1	32	F	1	3
19	C	3	GHA	1	37	F	1	2
[truncated: 522 more rows]

## Sheet: explanation
columns:	generation	population	population_replicate	treatment	treatment_replicate	day	sex	status	repeat
generation: 5, 10, 15, 19
population: S = selected for resistance to fungus; C = control (not selected for resistance)
population_replicate: There are four populations that are selected for resistance, called S1, S2, S3 and S4. The other four populations are the controls, C1, C2, C3 and C4.
		The "population_replicate" column has numbers 1, 2, 3, 4. This column needs to be combined with the "population" column to give you the full population name.
treatment: Each of the eight populations underwent two treatments, either exposed to fungus, or control (not exposed to fungus).
	The groups that were exposed to fungus have "GHA" written in this column. The other have "Control" in this column.
treatment_replicate: Each treatment was done twice for each population. This column contains numbers 1 or 2 which arbitrarily label the two treatment replicates.
day: This is days post inoculation/handling. For generations 10 and 19, day continues until all flies die. For generations 5 and 15, only 19 days were followed.
sex: female (F) or male (M)
status: This column tells us whether the observations was of dead flies ("1") or censored flies ("0").
	Censor occurs in two ways in this data set. Consider a hypothetical group of 50 flies. If 35 of them died in the first 19 days of the generation 15 assay, then 35 would still be alive on day 19.
	Those 35 flies would be censored and this would show up as "19" in column day and "0" in column status.
	Alternatively, lets assume that a fly from the same group escaped or was accidentally killed on day 14 of the experiment. Assume that on day 14 there were also 3 flies that actually died on that day.
	In this situation you would see "day 14, status 0, repeat 1" to reflect the one fly that escaped on day 14, and "day 14, status 1, repeat 3" to reflect the 3 flies that died on day 14.
repeat: As described above, repeat tells us how many flies fall in the condition described by the other columns.
	For example:
	generation	population	population_replicate	treatment	treatment_replicate	day	sex	status	repeat
	15	C	2	GHA	1	14	F	1	3
	Here the "3" in column replicate means that there should actually be three rows with the same information. So you can change the above column to the following three columns:
	generation	population	population_replicate	treatment	treatment_replicate	day	sex	status
	15	C	2	GHA	1	14	F	1
	15	C	2	GHA	1	14	F	1
	15	C	2	GHA	1	14	F	1
	Notice that the new data set will no longer have the column for "repeat" because that information is already represented now with the rows.
	You can do this in R using something like the following:
	for(i in 1:nrow(source_data)) {
	for (j in 1:source_data[i,9]) {
	# repeat count is in column 9 "repeat"
	# We want to repeat the data in columns 1:8
	prepared_data <- rbind(prepared_data, source_data [i,1:8])
	# rbind is slow, but works for this
	}
	}
	# prepared_data now contains a sanitized copy of the source data
	# We can export this new table as a csv file
	write.csv(prepared_data, "prepared data.csv",row.names=FALSE)
	# If we view "prepared_data" we see that R has added a column to name each row with "ij" as defined above.
	# We specify row.names = FALSE to remove the ij column from the exported data file
